# Supplementary material
Source: PubMed Central journal article supplement (PMC10308294)
Supplement: jamasurg-e232277-s001.pdf [file jamasurg-e232277-s001.pdf]

## Supplemental Online Content

Serrano E, Voldal EC, Machado-Aranda D, et al; for the Writing Group for the CODA Collaborative. Trial participation and outcomes among English-speaking and Spanish-speaking patients with appendicitis randomized to antibiotics: a secondary analysis of the CODA randomized clinical trial. *JAMA Surg*. Published online June 28, 2023. doi:10.1001/jamasurg.2023.2277

**eTable 1.** Additional baseline characteristics for participants randomized to antibiotics or appendectomy

**eFigure.** Description of sites in the CODA trial, ordered by number of participants in each site who were randomized to antibiotics or appendectomy (n)

**eTable 2.** Baseline characteristics of participants who were randomized to either antibiotics or appendectomy and recruited from the five sites that recruited many Spanish-speaking patients

**eTable 3.** Outcomes for participants randomized to antibiotics who were recruited from the five sites that recruited many Spanish patients

**eAppendix 1.** Missing data

**eAppendix 2.** The CODA Trial Sites and Site Leads

**eReference**

This supplemental material has been provided by the authors to give readers additional information about their work.

.

**eTable 1. additional baseline characteristics for participants randomized to antibiotics or appendectomy**

|                             |                                   | Overall<br>(n=1552) | English<br>(n=1076) | Spanish<br>(n=476) |
|-----------------------------|-----------------------------------|---------------------|---------------------|--------------------|
| Age, years (%)              | [18,35)                           | 761 (49)            | 568 (53)            | 193 (41)           |
|                             | [35,50)                           | 493 (32)            | 310 (29)            | 183 (38)           |
|                             | [50,65)                           | 239 (15)            | 155 (14)            | 84 (18)            |
|                             | [65,100)                          | 59 (4)              | 43 (4)              | 16 (3)             |
| Gender same as sex (%)      | No                                | 14 (1)              | 8 (1)               | 6 (1)              |
|                             | Yes                               | 1492 (99)           | 1045 (99)           | 447 (99)           |
| Insurance (%)               | Commercial                        | 640 (42)            | 610 (58)            | 30 (7)             |
|                             | Medicare or Tricare               | 178 (12)            | 118 (11)            | 60 (13)            |
|                             | Medicaid or state                 | 265 (18)            | 142 (13)            | 123 (27)           |
|                             | Other                             | 77 (5)              | 43 (4)              | 34 (7)             |
|                             | None                              | 354 (23)            | 143 (14)            | 211 (46)           |
| Education (%)               | Less than high school             | 324 (21)            | 46 (4)              | 278 (60)           |
|                             | High school or GED                | 309 (20)            | 184 (17)            | 125 (27)           |
|                             | Some college                      | 296 (19)            | 265 (25)            | 31 (7)             |
|                             | Associate degree                  | 93 (6)              | 91 (9)              | 2 (0)              |
|                             | Occupational/technical/vocational | 56 (4)              | 42 (4)              | 14 (3)             |
|                             | Bachelor's degree                 | 284 (19)            | 276 (26)            | 8 (2)              |
|                             | Master's degree                   | 115 (8)             | 108 (10)            | 7 (2)              |
|                             | Professional degree               | 37 (2)              | 37 (3)              | 0 (0)              |
|                             | Doctoral degree                   | 16 (1)              | 16 (2)              | 0 (0)              |
| Charlson (mean (SD))        |                                   | 0.24 (0.53)         | 0.24 (0.54)         | 0.25 (0.51)        |
| Charlson above 0 (%)        | No                                | 1232 (80)           | 861 (80)            | 371 (78)           |
|                             | Yes                               | 315 (20)            | 210 (20)            | 105 (22)           |
| Body mass index (mean (SD)) |                                   | 28.8 (6.47)         | 28.7 (7.02)         | 29.0 (4.89)        |
| Body mass index (%)         | Less than 25                      | 376 (29)            | 303 (32)            | 73 (19)            |
|                             | [25,30)                           | 466 (35)            | 296 (32)            | 170 (45)           |
|                             | [30,35)                           | 283 (21)            | 188 (20)            | 95 (25)            |
|                             | 35 and above                      | 192 (15)            | 149 (16)            | 43 (11)            |

|                                                      |                         |              |              |              |
|------------------------------------------------------|-------------------------|--------------|--------------|--------------|
| Imaging: CT only (%)                                 | No                      | 317 (20)     | 239 (22)     | 78 (16)      |
|                                                      | Yes                     | 1235 (80)    | 837 (78)     | 398 (84)     |
| Imaging: Ultrasound only (%)                         | No                      | 1498 (97)    | 1027 (95)    | 471 (99)     |
|                                                      | Yes                     | 54 (3)       | 49 (5)       | 5 (1)        |
| Multiple imaging types (%)                           | No                      | 1290 (83)    | 887 (82)     | 403 (85)     |
|                                                      | Yes                     | 262 (17)     | 189 (18)     | 73 (15)      |
| Alvarado (mean (SD))                                 |                         | 6.63 (1.66)  | 6.54 (1.69)  | 6.81 (1.58)  |
| Fever (%)                                            | No                      | 1172 (76)    | 836 (78)     | 336 (71)     |
|                                                      | Yes                     | 379 (24)     | 239 (22)     | 140 (29)     |
| White blood cell count (thousand/microL) (mean (SD)) |                         | 13.06 (4.06) | 12.82 (4.05) | 13.61 (4.05) |
| Appendiceal diameter, mm (mean (SD))                 |                         | 11.39 (2.86) | 11.44 (2.92) | 11.27 (2.74) |
| Appendiceal diameter, mm (%)                         | 8 or smaller            | 186 (14)     | 133 (14)     | 53 (13)      |
|                                                      | (8,10]                  | 389 (29)     | 265 (29)     | 124 (31)     |
|                                                      | larger than 10          | 758 (57)     | 529 (57)     | 229 (56)     |
| Abscess on imaging (%)                               | No                      | 1543 (100)   | 1071 (100)   | 472 (99)     |
|                                                      | Yes                     | 2 (0)        | 1 (0)        | 1 (0)        |
|                                                      | Ambiguous               | 4 (0)        | 2 (0)        | 2 (0)        |
| Perforation on imaging (%)                           | No                      | 1433 (97)    | 978 (96)     | 455 (97)     |
|                                                      | Yes                     | 17 (1)       | 11 (1)       | 6 (1)        |
|                                                      | Ambiguous               | 34 (2)       | 27 (3)       | 7 (1)        |
| Periappendiceal fat on imaging (%)                   | None or not mentioned   | 371 (25)     | 276 (27)     | 95 (20)      |
|                                                      | Mild                    | 419 (28)     | 262 (26)     | 157 (33)     |
|                                                      | Moderate                | 123 (8)      | 80 (8)       | 43 (9)       |
|                                                      | Severe (phlegmon)       | 28 (2)       | 16 (2)       | 12 (3)       |
|                                                      | Present but unspecified | 551 (37)     | 388 (38)     | 163 (35)     |
| Periappendiceal fluid on imaging (%)                 | No                      | 1154 (74)    | 772 (72)     | 382 (80)     |
|                                                      | Yes                     | 395 (26)     | 301 (28)     | 94 (20)      |

Footnote: Alvarado scores range from 0 to 10, with higher scores indicating a higher likelihood of having appendicitis.

Footnote: Scores on the modified Charlson comorbidity index range from 0 to 40, with lower scores indicating fewer coexisting conditions and a lower short-term risk of death.

**eFigure 1. description of sites in the CODA trial, ordered by number of participants in each site who were randomized to antibiotics or appendectomy (n).**

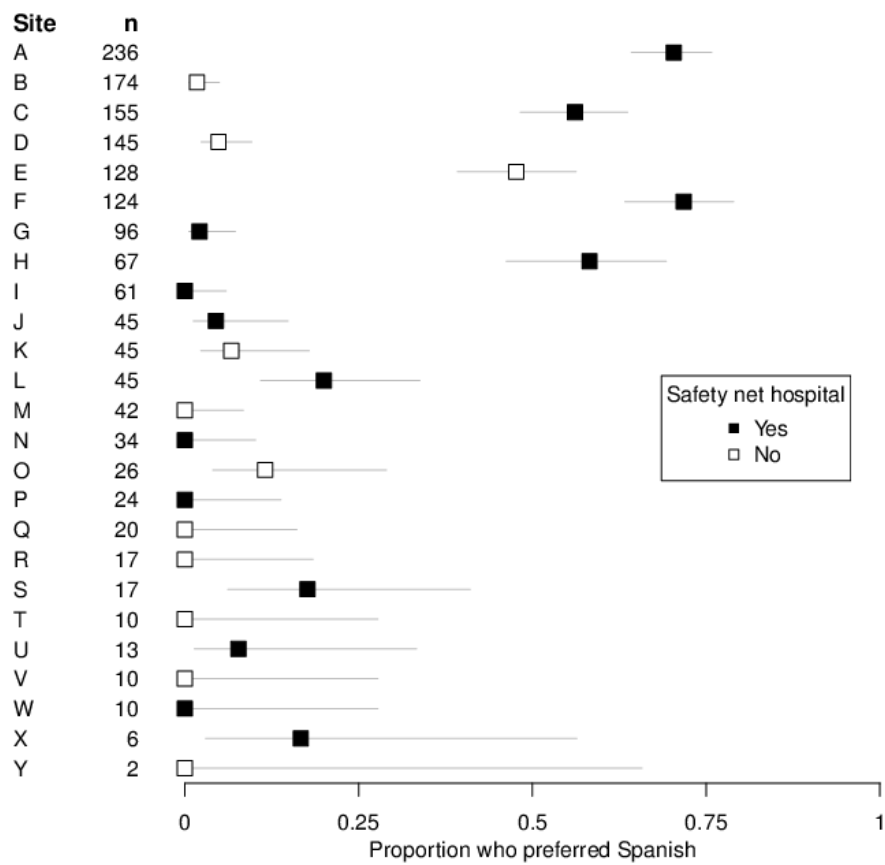

Footnote: Safety net hospitals were defined as hospitals that provide health care regardless of ability to pay<sup>1</sup>

**eTable 2. Baseline characteristics of participants who were randomized to either antibiotics or appendectomy and recruited from the five sites that recruited many Spanish-speaking patients.**

|                                       |                                                  | Overall<br>(n=710) | English<br>(n=268) | Spanish<br>(n=442) |
|---------------------------------------|--------------------------------------------------|--------------------|--------------------|--------------------|
| Race (%)                              | Asian                                            | 28 (4)             | 28 (11)            | 0 (0)              |
|                                       | Black                                            | 61 (9)             | 46 (17)            | 15 (3)             |
|                                       | White                                            | 309 (45)           | 106 (40)           | 203 (47)           |
|                                       | Multiple/Other*                                  | 296 (43)           | 83 (32)            | 213 (49)           |
| Hispanic (%)                          | No                                               | 106 (15)           | 105 (39)           | 1 (0)              |
|                                       | Yes                                              | 604 (85)           | 163 (61)           | 441 (100)          |
| Age, years<br>(mean (SD))             |                                                  | 38.0 (13.0)        | 34.4 (12.4)        | 40.1 (12.9)        |
| Sex (%)                               | Male                                             | 461 (65)           | 175 (65)           | 286 (65)           |
|                                       | Female                                           | 249 (35)           | 93 (35)            | 156 (35)           |
| Insurance (%)                         | Commercial                                       | 89 (13)            | 65 (25)            | 24 (6)             |
|                                       | Medicare or<br>Tricare                           | 96 (14)            | 37 (14)            | 59 (14)            |
|                                       | Medicaid or<br>state                             | 188 (27)           | 65 (25)            | 123 (29)           |
|                                       | Other or none                                    | 321 (46)           | 97 (37)            | 224 (52)           |
| Below federal<br>poverty level<br>(%) | No                                               | 123 (29)           | 77 (48)            | 46 (17)            |
|                                       | Yes                                              | 301 (71)           | 84 (52)            | 217 (83)           |
| Education (%)                         | Some beyond<br>high<br>school/GED                | 232 (33)           | 176 (66)           | 56 (13)            |
|                                       | High<br>school/GED                               | 184 (26)           | 67 (25)            | 117 (27)           |
|                                       | Less than high<br>school                         | 286 (41)           | 22 (8)             | 264 (60)           |
| Health literacy<br>help (%)           | Never or rarely                                  | 485 (70)           | 228 (87)           | 257 (60)           |
|                                       | Sometimes or<br>more                             | 206 (30)           | 33 (13)            | 173 (40)           |
| Employment<br>and activity (%)        | Employed<br>(active some of<br>the time or less) | 215 (31)           | 80 (30)            | 135 (31)           |
|                                       | Employed<br>(active most or<br>all of the time)  | 272 (39)           | 95 (36)            | 177 (40)           |
|                                       | Student/unempl<br>oyed/retired/oth<br>er         | 215 (31)           | 89 (34)            | 126 (29)           |
| Duration of<br>symptoms (%)           | Less than a day                                  | 131 (18)           | 57 (21)            | 74 (17)            |
|                                       | 1 or more days                                   | 579 (82)           | 211 (79)           | 368 (83)           |

|                   |     |          |          |          |
|-------------------|-----|----------|----------|----------|
| Appendicolith (%) | No  | 525 (74) | 186 (69) | 339 (77) |
|                   | Yes | 185 (26) | 82 (31)  | 103 (23) |

\*Other race includes: American Indian, Alaska Native, Native Hawaiian, Pacific Islander, and other/not

listed. The most common response for 'other' race was Hispanic.

**eTable 3. Outcomes for participants randomized to antibiotics who were recruited from the five sites that recruited many Spanish patients.**

|                                                  |                      | Overall<br>(n=352) | English<br>(n=131) | Spanish<br>(n=221) |
|--------------------------------------------------|----------------------|--------------------|--------------------|--------------------|
| Appendectomy<br>within 30d (%)                   | Yes                  | 74 (21)            | 25 (19)            | 49 (22)            |
|                                                  | No                   | 265 (75)           | 101 (77)           | 164 (74)           |
|                                                  | Lost to<br>follow-up | 13 (4)             | 5 (4)              | 8 (4)              |
| Symptom resolution<br>at 30d (%)                 | No                   | 99 (34)            | 35 (33)            | 64 (34)            |
|                                                  | Yes                  | 196 (66)           | 71 (67)            | 125 (66)           |
| EQ-5D at 30d (mean<br>(SD))                      |                      | 0.93 (0.12)        | 0.91 (0.14)        | 0.93 (0.11)        |
| Days of work missed<br>within 30d (mean<br>(SD)) |                      | 6.03 (7.20)        | 4.99 (6.58)        | 6.57 (7.47)        |

## eAppendix 1. Missing data

Data on missing appendectomy status is presented in Table 2. Outcomes involving emergency department/urgent care visits and overnight hospital stays within 30 days were missing only if participants did not return their 30-day survey. For other variables, information about missing data is presented in the tables below.

Table: Details about missing data from Table 1. Cells are count (percent) of participants who were missing information on each characteristic, broken down by language.

|                             | Overall<br>(n=1552) | English<br>(n=1076) | Spanish<br>(n=476) |
|-----------------------------|---------------------|---------------------|--------------------|
| Race                        | 22 (1)              | 10 (1)              | 12 (3)             |
| Hispanic                    | 0 (0)               | 0 (0)               | 0 (0)              |
| Age                         | 0 (0)               | 0 (0)               | 0 (0)              |
| Sex                         | 0 (0)               | 0 (0)               | 0 (0)              |
| Insurance                   | 38 (2)              | 20 (2)              | 18 (4)             |
| Below federal poverty level | 460 (30)            | 266 (25)            | 194 (41)           |
| Education                   | 22 (1)              | 11 (1)              | 11 (2)             |
| Health literacy help        | 61 (4)              | 45 (4)              | 16 (3)             |
| Employment and activity     | 45 (3)              | 40 (4)              | 5 (1)              |
| Duration of symptoms        | 2 (0)               | 2 (0)               | 0 (0)              |
| Appendicolith               | 0 (0)               | 0 (0)               | 0 (0)              |

Table: Details about missing data from Table 2. Cells are count (percent) of participants who were missing information on each outcome, broken down by language.

|                            | Overall<br>(n=776) | English<br>(n=538) | Spanish<br>(n=238) |
|----------------------------|--------------------|--------------------|--------------------|
| Symptom resolution at 7d   | 62 (8)             | 44 (8)             | 18 (8)             |
| Symptom resolution at 14d  | 91 (12)            | 63 (12)            | 28 (12)            |
| Symptom resolution at 30d  | 100 (13)           | 66 (12)            | 34 (14)            |
| EQ-5D at 30d               | 93 (12)            | 63 (12)            | 30 (13)            |
| Decisional regret 30d      | 118 (15)           | 70 (13)            | 48 (20)            |
| Treatment satisfaction 30d | 106 (14)           | 72 (13)            | 34 (14)            |
| Days of work missed 30d    | 285 (37)           | 209 (39)           | 76 (32)            |



## **eAppendix 2. The CODA Trial Sites and Site Leads**

*Sites and Site Leads:* Bellevue Hospital Center New York University School of Medicine: Patricia Ayoung-Chee, MD, MPH, William Chiang, MD; Beth Israel Deaconess Medical Center: Charles Parsons, MD, Stephen R. Odom, MD, Nathan I. Shapiro, MD, MPH; Boston University Medical Center: Sabrina E. Sanchez, MD, MPH, F. Thurston Drake, MD, MPH; Columbia University Medical Center: Katherine Fischkoff, MD, Aleksandr Tichter, MD; Harbor-University of California Los Angeles Medical Center: Daniel A. DeUgarte, MD, Amy H. Kaji, MD, PhD; Harborview Medical Center: Heather Evans, MD, MS, Joseph Cuschieri, MD, Amber K. Sabbatini, MD, MPH; Henry Ford Health Hospital: Jeffrey Johnson, MD, Joe H. Patton, MD; Madigan Army Medical Center: Vance Sohn, MD, Karen McGrane, MD; Maine Medical Center: Damien W. Carter, MD; The Ohio State University Wexner Medical Center: Steven Steinberg, MD, David Evans, MD; Olive View-University of California Los Angeles Medical Center: Darin Saltzman MD, PhD, David A. Talan, MD, Gregory J. Moran, MD; Providence Regional Medical Center Everett: Careen S. Foster, MD, Brandon Tudor, MD; Rush University Medical Center: Thea P. Price, MD; Swedish Medical Center: Katherine A. Mandell, MD, MPH; Tisch Hospital New York University Langone Medical Center: Patricia Ayoung-Chee, MD, MPH, William Chiang, MD; UHealth University of Colorado Hospital: Lisa Ferrigno, MD, MPH, Matthew Salzberg, MD, MBA; University of Iowa Hospitals and Clinics: Dionne A. Skeete, MD, Brett A. Faine, PharmD, MS; University of Michigan Medical Center: Pauline K. Park, MD, Hasan B. Alam, MD; University of Mississippi Medical Center: Matthew E. Kutcher, MD, MS, Alan Jones, MD; McGovern Medical School at The University of Texas Health Science Center at Houston (UTHealth): Lillian S. Kao, MD, MS; University of Texas Lyndon B. Johnson General Hospital: Mike K. Liang, MD; University of Washington Medical Center: Giana H. Davidson, MD, MPH, Amber K. Sabbatini, MD, MPH; Vanderbilt University Medical Center: Callie M. Thompson, MD, Wesley H. Self, MD, MPH; Virginia Mason Medical Center: Abigail Wiebusch, MD, Juliana T. Yu, MD; Weill Cornell Medical Center: Robert J. Winchell, MD, Sunday Clark, ScD, MPH.

*Collaborators:* BID: Charles Parsons, Nathan I. Shapiro; COL: Randall Cooper, Aleksandr Tichter; HFH: Joe H. Patton Alyssa Hayward, Lillian Adrianna Hayes; HMC: Hikmatullah Arif, Laura Hennessey, Erika Wolff, Farhood Farjah, Kelsey Pullar; IOW: Brett Faine, Cathy Fairfield, Dionne Skeete; LBJ: Debbie Lew, Karla Bernardi, Naila Dhanani, Oscar Olavarria, Stephanie Marquez, Tien C. Ko; MAD: Vance Sohn; MIS: Alan Jones, Deepti Patki, Matthew Kutcher, Rebekah K. Peacock; MMC: Bruce Chung, Damien Carter, David MacKenzie, Debra Burris, Joseph Mack, Terilee Gerry; NYT: Jason Maggi, Kristyn Pierce, Marcovalerio Melis, Mohamad Abouzeid, Paresh Shah, Prashant Sinha, William Chiang; OSU: Amy Rushing, Steven Steinberg; PRE: Brandon Tudor, Careen Foster, Shaina Schaetzel; SWE: Dayna Morgan, John Tschirhart, Julie Wallick, Katherine Mandell, Ryan Martinez, Sean Wells; UCH: Brant Putnam, Dennis Kim, Erin C. Howell, Lara H. Spence, Ross Fleischman; UCO: Darin Saltzman, Debbie Mireles, Formosa Chen, Gregory Moran, Kavitha Pathmarajah, Lisandra Uribe, Paul J Schmit, Robert Bennion; UOM: Cindy Hsu, Krishnan Raghavendran, Nathan Haas, Norman Olbrich, Pauline Park; UOW: Amber Sabbatini, Daniel Kim, Estel Williams, Karen Horvath, Zoe Parr; VAN: Karen F. Miller, Kelly M. Moser; VMM:

Abigail Wiebusch, Julianna Yu, Scott Osborn; WCM: Billie Johnsson, Lauren Mount. Robert J. Winchell, Sunday Clark

*Executive Committee:* Bonnie Bizzell, MBA, MEd (Chair, Patient Advisory Board); Bryan Comstock, MS (Operations Director, Data Coordinating Center); Giana Davidson, MD, MPH (Chair, Clinical Coordinating Center); Erin Fannon (Senior Project Manager); David R. Flum, MD, MPH (Co-Principal Investigator); Patrick J. Heagerty, PhD, MS (Director, Data Coordinating Center); Larry G. Kessler, ScD (Chair, Executive Committee); Anusha Krishnadasan, PhD (Project Manager, California); Danielle C. Lavalley, PharmD, PhD (Director, Stakeholder Coordinating Center); Sarah O. Lawrence (Director, Stakeholder Coordinating Center); Sarah E. Monsell, MS (Lead Biostatistician); Kelsey Pullar, MPH (Research Coordinator Lead); David A. Talan, MD (Co-Principal Investigator); Erika Wolff, PhD (Executive Director, SORCE (UOW))

*Patient Advisory Board:* Meredith Weiss, Kimberly Deeney, Heather VanDusen, Elliott Skopin, Mary Guiden, Miriam Hernandez

*National Advisory Board:* Emily E. Anderson, PhD, MPH; Darrell A. Campbell, Jr., MD; Fergal Fleming, MD; David B. Hoyt, MD; J.J. Tepas III, MD (Deceased); Richard W. Whitten, MD; SreyRam Kuy, MD; Daniel S. Lessler, MD, MHA.

*Data Safety and Monitoring Board:* Karla Ballman, PhD; Thomas Diflo, MD; Bruce Wolfe, MD; Arden Morris, MD; Donald Yealy, MD. Patient Advisors: Kathleen O'Connor, EdD; Olga Owens, N-PC

## eReference

1. Institute of Medicine (US) Committee on Assuring the Health of the Public in the 21st Century. The Future of the Public's Health in the 21st Century. National Academies Press (US); 2002.
