# Supplementary material
Source: PubMed Central journal article supplement (PMC10308294)
Supplement: jamasurg-e232277-s003.pdf [file jamasurg-e232277-s003.pdf]

\*First name, last name, and suffix (if applicable) are required and will appear in PubMed.

| <b>*Group Name(s): CODA Collaborative</b> |                   |                              |                         |                                                                 |                                                 |                                                                |                                                                                                   |
|-------------------------------------------|-------------------|------------------------------|-------------------------|-----------------------------------------------------------------|-------------------------------------------------|----------------------------------------------------------------|---------------------------------------------------------------------------------------------------|
| <b>*First Name and Middle Initial(s)</b>  | <b>*Last Name</b> | <b>*Suffix (eg, Jr, III)</b> | <b>Academic Degrees</b> | <b>Institution</b>                                              | <b>Location (city, state/province, country)</b> | <b>Role or Contribution, eg, chair, principal investigator</b> | <b>Group (if more than 1 Group listed in the byline) and/or Subgroup (eg, Steering Committee)</b> |
| Mohamad                                   | Abouzeid          |                              | MD                      | Tisch Hospital NYU Langone Medical Center                       | New York, NY, USA                               | Co-Investigator                                                | Clinical Coordinating Center                                                                      |
| Hasan B.                                  | Alam              |                              | MD                      | University of Michigan Medical Center                           | Ann Arbor, MI, USA                              | Co-Investigator                                                | Clinical Coordinating Center                                                                      |
| Hikmatullah                               | Arif              |                              |                         | Harborview Medical Center                                       | Seattle, WA, USA                                | Study Staff                                                    | Clinical Coordinating Center                                                                      |
| Karla                                     | Ballman           |                              | PhD                     | Weill Cornell Medical Center                                    | New York, NY, USA                               | Clinical Reviewer                                              | Data Safety and Monitoring Board                                                                  |
| Robert                                    | Bennion           |                              | MD                      | Olive View- University of California Los Angeles Medical Center | Los Angeles, CA, USA                            | Co-Investigator                                                | Clinical Coordinating Center                                                                      |
| Debra                                     | Burris            |                              | RN                      | Maine Medical Center                                            | Portland, ME, USA                               | Study Staff                                                    | Clinical Coordinating Center                                                                      |
| Damien                                    | Carter            |                              | MD                      | Maine Medical Center                                            | Portland, ME, USA                               | Co-Investigator                                                | Clinical Coordinating Center                                                                      |
| Formosa                                   | Chen              |                              | MD, MPH                 | Olive View- University of California Los Angeles Medical Center | Los Angeles, CA, USA                            | Co-Investigator                                                | Clinical Coordinating Center                                                                      |
| Bruce                                     | Chung             |                              | MD                      | Oregon Health & Science University                              | Portland, OR, USA                               | Co-Investigator                                                | Clinical Coordinating Center                                                                      |
| Sunday                                    | Clark             |                              | ScD, MPH                | Weill Cornell Medical Center                                    | New York, NY, USA                               | Co-Investigator                                                | Clinical Coordinating Center                                                                      |
| Randall                                   | Cooper            |                              |                         | Columbia University Medical Center                              | New York, NY, USA                               | Co-Investigator                                                | Clinical Coordinating Center                                                                      |
| Joseph                                    | Cuschieri         |                              | MD                      | HMC                                                             | Seattle, WA, USA                                | Co-Investigator                                                | Clinical Coordinating Center                                                                      |
| Kimberly                                  | Deeney            |                              | BA                      | PAB                                                             | Seattle, WA, USA                                | Advisor                                                        | Patient Advisory Board                                                                            |
| Naila                                     | Dhanani           |                              | MD                      | University of Texas Lyndon B. Johnson General Hospital          | Houston, TX, USA                                | Co-Investigator                                                | Clinical Coordinating Center                                                                      |
| Thomas                                    | Diflo             |                              | MD                      | Westchester Medical Center                                      | Valhalla, NY, USA                               | Clinical Reviewer                                              | Data Safety and Monitoring Board                                                                  |
| Cathy                                     | Fairfield         |                              | BSN                     | University of Iowa Healthcare                                   | Iowa City, IA, USA                              | Study Staff                                                    | Clinical Coordinating Center                                                                      |
| Farhood                                   | Farjah            |                              | MD, MPH                 | Harborview Medical Center                                       | Seattle, WA, USA                                | Co-Investigator                                                | Clinical Coordinating Center                                                                      |
| Lisa                                      | Ferrigno          |                              | MD, MPH                 | UCD                                                             | Denver, CO, USA                                 | Co-Investigator                                                | Clinical Coordinating Center                                                                      |
| Careen                                    | Foster            |                              | MD                      | Providence Regional Medical Center Everett                      | Everett, WA, USA                                | Co-Investigator                                                | Clinical Coordinating Center                                                                      |
| Terilee                                   | Gerry             |                              | MS, RN                  | Maine Medical Center                                            | Portland, ME, USA                               | Study Staff                                                    | Clinical Coordinating Center                                                                      |
| Melinda                                   | Gibbons           |                              | MD                      | UCO                                                             | Symar, CA, USA                                  | Co-Investigator                                                | Clinical Coordinating Center                                                                      |
| Mary                                      | Guiden            |                              | BA                      | PAB                                                             | Fort Collins, CO, USA                           | Advisor                                                        | Patient Advisory Board                                                                            |
| Nathan                                    | Haas              |                              | MD                      | University of Michigan Medical Center                           | Ann Arbor, MI, USA                              | Co-Investigator                                                | Clinical Coordinating Center                                                                      |
| Lillian Adrianna                          | Hayes             |                              |                         | Henry Ford Health Hospital                                      | Detroit, MI, USA                                | Study Staff                                                    | Clinical Coordinating Center                                                                      |
| Alyssa                                    | Hayward           |                              |                         | Henry Ford Health Hospital                                      | Detroit, MI, USA                                | Study Staff                                                    | Clinical Coordinating Center                                                                      |
| Laura                                     | Hennessey         |                              | RN                      | Harborview Medical Center                                       | Los Angeles, CA, USA                            | Study Staff                                                    | Clinical Coordinating Center                                                                      |
| Miriam                                    | Hernandez         |                              |                         | PAB                                                             | Seattle, WA, USA                                | Advisor                                                        | Patient Advisory Board                                                                            |
| Karen F.                                  | Horvath           |                              | RN, MPA                 | Vanderbilt University Medical Center                            | Nashville, TN, USA                              | Co-Investigator                                                | Clinical Coordinating Center                                                                      |
| Erin C.                                   | Howell            |                              | MD                      | Harbor- University of California Los Angeles Medical Center     | Los Angeles, CA, USA                            | Co-Investigator                                                | Clinical Coordinating Center                                                                      |
| Cindy                                     | Hsu               |                              | MD, PHD                 | University of Michigan Medical Center                           | Ann Arbor, MI, USA                              | Co-Investigator                                                | Clinical Coordinating Center                                                                      |
| Jeffrey                                   | Johnson           |                              | MD                      | Henry Ford Health Hospital                                      | Detroit, MI, USA                                | Co-Investigator                                                | Clinical Coordinating Center                                                                      |
| Billie                                    | Johnsson          |                              | MS                      | Weill Cornell Medical Center                                    | New York, NY, USA                               | Co-Investigator                                                | Clinical Coordinating Center                                                                      |
| Dennis                                    | Kim               |                              | MD                      | Harbor- University of California Los Angeles Medical Center     | Los Angeles, CA, USA                            | Co-Investigator                                                | Clinical Coordinating Center                                                                      |
| Daniel                                    | Kim               |                              | MD                      | University of Washington                                        | Seattle, WA, USA                                | Co-Investigator                                                | Clinical Coordinating Center                                                                      |
| Tien C.                                   | Ko                |                              | MD                      | University of Texas Lyndon B. Johnson General Hospital          | Houston, TX, USA                                | Co-Investigator                                                | Clinical Coordinating Center                                                                      |
| Danielle C.                               | Lavallee          |                              | PhD                     | University of Washington                                        | Seattle, WA, USA                                | Clinical Reviewer                                              | Data Safety and Monitoring Board                                                                  |
| Debbie                                    | Lew               |                              |                         | University of Texas Lyndon B. Johnson General Hospital          | Houston, TX, USA                                | Study Staff                                                    | Clinical Coordinating Center                                                                      |
| Joseph                                    | Mack              |                              | MD                      | Maine Medical Center                                            | Portland, ME, USA                               | Co-Investigator                                                | Clinical Coordinating Center                                                                      |
| David                                     | MacKenzie         |                              | MD                      | Maine Medical Center                                            | Portland, ME, USA                               | Co-Investigator                                                | Clinical Coordinating Center                                                                      |
| Jason                                     | Maggi             |                              | MD                      | Tisch Hospital NYU Langone Medical Center                       | New York, NY, USA                               | Co-Investigator                                                | Clinical Coordinating Center                                                                      |
| Stephanie                                 | Marquez           |                              |                         | University of Texas Lyndon B. Johnson General Hospital          | Houston, TX, USA                                | Co-Investigator                                                | Clinical Coordinating Center                                                                      |
| Ryan                                      | Martinez          |                              | MD                      | Swedish Medical Center                                          | Seattle, WA, USA                                | Co-Investigator                                                | Clinical Coordinating Center                                                                      |
| Karen                                     | McGrane           |                              | MD                      | Madigan Army Medical Center                                     | Joint Base Lewis-McChord, WA, USA               | Co-Investigator                                                | Clinical Coordinating Center                                                                      |
| Marcovalerio                              | Melis             |                              | MD                      | Tisch Hospital NYU Langone Medical Center                       | New York, NY, USA                               | Co-Investigator                                                | Clinical Coordinating Center                                                                      |
| Karen                                     | Miller            |                              | MD                      | University of Washington                                        | Seattle, WA, USA                                | Study Staff                                                    | Clinical Coordinating Center                                                                      |
| Debbie                                    | Mireles           |                              | NP                      | Olive View- University of California Los Angeles Medical Center | Los Angeles, CA, USA                            | Study Staff                                                    | Clinical Coordinating Center                                                                      |

## Supplemental Online Content: Nonauthor Collaborators

\*First name, last name, and suffix (if applicable) are required and will appear in PubMed.

| *First Name and Middle Initial(s) | *Last Name  | *Suffix (eg, Jr, III) | Academic Degrees | Institution                                                     | Location (city, state/province, country) | Role or Contribution, eg, chair, principal investigator | Group (if more than 1 Group listed in the byline) and/or Subgroup (eg, Steering Committee) |
|-----------------------------------|-------------|-----------------------|------------------|-----------------------------------------------------------------|------------------------------------------|---------------------------------------------------------|--------------------------------------------------------------------------------------------|
| Gregory J.                        | Moran       |                       | MD               | Olive View- University of California Los Angeles Medical Center | Los Angeles, CA, USA                     | Co-Investigator                                         | Clinical Coordinating Center                                                               |
| Dayna                             | Morgan      |                       | MSNBC            | Swedish Medical Center                                          | Seattle, WA, USA                         | Study Staff                                             | Clinical Coordinating Center                                                               |
| Arden                             | Morris      |                       | MD, MPH          | Stanford University                                             | Palo Alto, CA, USA                       | Clinical Reviewer                                       | Data Safety and Monitoring Board                                                           |
| Kelly M.                          | Moser       |                       |                  | Vanderbilt University Medical Center                            | Nashville, TN, USA                       | Study Staff                                             | Clinical Coordinating Center                                                               |
| Lauren                            | Mount       |                       | MD               | Weill Cornell Medical Center                                    | New York, NY, USA                        | Co-Investigator                                         | Clinical Coordinating Center                                                               |
| Kathleen                          | O'Connor    |                       | EdD              |                                                                 | Seattle, WA, USA                         | Clinical Reviewer                                       | Data Safety and Monitoring Board                                                           |
| Oscar                             | Olavarria   |                       | MD               | University of Texas Lyndon B. Johnson General Hospital          | Houston, TX, USA                         | Co-Investigator                                         | Clinical Coordinating Center                                                               |
| Norman                            | Olbrich     |                       |                  | University of Michigan Medical Center                           | Ann Arbor, MI, USA                       | Study Staff                                             | Clinical Coordinating Center                                                               |
| Scott                             | Osborn      |                       | MD               | Virginia Mason Medical Center                                   | Seattle, WA, USA                         | Co-Investigator                                         | Clinical Coordinating Center                                                               |
| Olga                              | Owens       |                       | N-PC             | DSMB                                                            | Las Vegas, NV                            | Clinical Reviewer                                       | Data Safety and Monitoring Board                                                           |
| Pauline                           | Park        |                       | MD               | University of Michigan Medical Center                           | Ann Arbor, MI, USA                       | Co-Investigator                                         | Clinical Coordinating Center                                                               |
| Zoe                               | Parr        |                       | MD               | University of Washington                                        | Seattle, WA, USA                         | Co-Investigator                                         | Clinical Coordinating Center                                                               |
| Charles S.                        | Parsons     |                       | MD               | Beth Israel Deaconess Medical Center                            | Boston, MA, USA                          | Co-Investigator                                         | Clinical Coordinating Center                                                               |
| Kavitha                           | Pathmarajah |                       | MPH              | Olive View- University of California Los Angeles Medical Center | Los Angeles, CA, USA                     | Study Staff                                             | Clinical Coordinating Center                                                               |
| Deepti                            | Patki       |                       | MS               | University of Mississippi Medical Center                        | Jackson, MS, USA                         | Study Staff                                             | Clinical Coordinating Center                                                               |
| Joe H.                            | Patton      |                       | MD               | Henry Ford Health Hospital                                      | Detroit, MI, USA                         | Co-Investigator                                         | Clinical Coordinating Center                                                               |
| Rebekah K.                        | Peacock     |                       | RN               | University of Mississippi Medical Center                        | Jackson, MS, USA                         | Study Staff                                             | Clinical Coordinating Center                                                               |
| Kristyn                           | Pierce      |                       | MS               | Tisch Hospital NYU Langone Medical Center                       | New York, NY, USA                        | Co-Investigator                                         | Clinical Coordinating Center                                                               |
| Kelsey                            | Pullar      |                       | MPH              | Harborview Medical Center                                       | Seattle, WA, USA                         | Study Staff                                             | Clinical Coordinating Center                                                               |
| Brant                             | Putnam      |                       | MD               | Harbor- University of California Los Angeles Medical Center     | Los Angeles, CA, USA                     | Co-Investigator                                         | Clinical Coordinating Center                                                               |
| Amy                               | Rushing     |                       | MD               | The Ohio State University Wexner Medical Center                 | Columbus, OH, USA                        | Co-Investigator                                         | Clinical Coordinating Center                                                               |
| Amber                             | Sabbatini   |                       | MD, MPH          | University of Washington                                        | Seattle, WA, USA                         | Co-Investigator                                         | Clinical Coordinating Center                                                               |
| Darin                             | Saltzman    |                       | MD, PhD          | Olive View- University of California Los Angeles Medical Center | Los Angeles, CA, USA                     | Co-Investigator                                         | Clinical Coordinating Center                                                               |
| Matthew                           | Salzberg    |                       | MD               | University of Mississippi Medical Center                        | Jackson, MS, USA                         | Co-Investigator                                         | Clinical Coordinating Center                                                               |
| Shaina                            | Schaetzel   |                       | MD               | Providence Regional Medical Center Everett                      | Everett, WA, USA                         | Co-Investigator                                         | Clinical Coordinating Center                                                               |
| Paul J                            | Schmidt     |                       | MD               | Olive View- University of California Los Angeles Medical Center | Los Angeles, CA, USA                     | Co-Investigator                                         | Clinical Coordinating Center                                                               |
| Paresh                            | Shah        |                       | MD               | Tisch Hospital NYU Langone Medical Center                       | New York, NY, USA                        | Co-Investigator                                         | Clinical Coordinating Center                                                               |
| Nathan I.                         | Shapiro     |                       | MD, MPH          | Beth Israel Deaconess Medical Center                            | Boston, MA, USA                          | Co-Investigator                                         | Clinical Coordinating Center                                                               |
| Prashant                          | Sinha       |                       | MD               | Tisch Hospital NYU Langone Medical Center                       | New York, NY, USA                        | Co-Investigator                                         | Clinical Coordinating Center                                                               |
| Dionne                            | Skeete      |                       | MD               | University of Iowa Healthcare                                   | Iowa City, IA, USA                       | Co-Investigator                                         | Clinical Coordinating Center                                                               |
| Elliott                           | Skopin      |                       | BS               | PAB                                                             | Seattle, WA, USA                         | Advisor                                                 | Patient Advisory Board                                                                     |
| Vance                             | Sohn        |                       | MD               | Madigan Army Medical Center                                     | Joint Base Lewis-McChord, WA, USA        | Co-Investigator                                         | Clinical Coordinating Center                                                               |
| Lara H.                           | Spence      |                       | MD               | Harbor- University of California Los Angeles Medical Center     | Los Angeles, CA, USA                     | Co-Investigator                                         | Clinical Coordinating Center                                                               |
| Steven                            | Steinberg   |                       | MD               | The Ohio State University Wexner Medical Center                 | Columbus, OH, USA                        | Co-Investigator                                         | Clinical Coordinating Center                                                               |
| Aleksandr                         | Tichter     |                       | MD               | Columbia University Medical Center                              | New York, NY, USA                        | Co-Investigator                                         | Clinical Coordinating Center                                                               |
| John                              | Tschirhart  |                       | MD               | Swedish Medical Center                                          | Seattle, WA, USA                         | Co-Investigator                                         | Clinical Coordinating Center                                                               |
| Brandon                           | Tudor       |                       | MD               | Providence Regional Medical Center Everett                      | Everett, WA, USA                         | Co-Investigator                                         | Clinical Coordinating Center                                                               |
| Lisandra                          | Uribe       |                       | BA               | Olive View- University of California Los Angeles Medical Center | Los Angeles, CA, USA                     | Study Staff                                             | Clinical Coordinating Center                                                               |
| Heather                           | VanDusen    |                       | BS               | PAB                                                             | Seattle, WA, USA                         | Advisor                                                 | Patient Advisory Board                                                                     |
| Julie                             | Wallick     |                       | BS, BA           | Swedish Medical Center                                          | Seattle, WA, USA                         | Study Staff                                             | Clinical Coordinating Center                                                               |
| Meridith                          | Weiss       |                       | MPH              | PAB                                                             | Seattle, WA, USA                         | Advisor                                                 | Patient Advisory Board                                                                     |
| Sean                              | Wells       |                       | MD               | Swedish Medical Center                                          | Seattle, WA, USA                         | Co-Investigator                                         | Clinical Coordinating Center                                                               |
| Abigail                           | Wiebusch    |                       | MD               | Virginia Mason Medical Center                                   | Seattle, WA, USA                         | Co-Investigator                                         | Clinical Coordinating Center                                                               |
| Estell J.                         | Williams    |                       | MD               | University of Washington                                        | Seattle, WA, USA                         | Co-Investigator                                         | Clinical Coordinating Center                                                               |
| Robert J.                         | Winchell    |                       | MD               | Weill Cornell Medical Center                                    | New York, NY, USA                        | Co-Investigator                                         | Clinical Coordinating Center                                                               |
| Jon                               | Wisler      |                       | MD               | Ohio State University                                           | Columbus, OH, USA                        | Co-Investigator                                         | Clinical Coordinating Center                                                               |
| Bruce                             | Wolfe       |                       | MD               | Maine Medical Center                                            | Portland, ME, USA                        | Clinical Reviewer                                       | Data Safety and Monitoring Board                                                           |
| Erika                             | Wolff       |                       | PhD              | Harborview Medical Center                                       | Seattle, WA, USA                         | Co-Investigator                                         | Executive Committee                                                                        |

Supplemental Online Content: Nonauthor Collaborators

\*First name, last name, and suffix (if applicable) are required and will appear in PubMed.

| *First Name and Middle Initial(s) | *Last Name | *Suffix (eg, Jr, III) | Academic Degrees | Institution                             | Location (city, state/province, country) | Role or Contribution, eg, chair, principal investigator | Group (if more than 1 Group listed in the byline) and/or Subgroup (eg, Steering Committee) |
|-----------------------------------|------------|-----------------------|------------------|-----------------------------------------|------------------------------------------|---------------------------------------------------------|--------------------------------------------------------------------------------------------|
| Donald M.                         | Yealy      |                       | MD               | University of Pittsburgh Medical Center | Jackson, MS, USA                         | Clinical Reviewer                                       | Data Safety and Monitoring Board                                                           |
| Julianna                          | Yu         |                       | MD               | Virginia Mason Medical Center           | Seattle, WA, USA                         | Co-Investigator                                         | Clinical Coordinating Center                                                               |
