# Supplementary material
Source: PubMed Central journal article supplement (PMC10308294)
Supplement: jamasurg-e232277-s004.pdf [file jamasurg-e232277-s004.pdf]

## Data Sharing Statement

Serrano. Trial Participation and Outcomes Among English-Speaking and Spanish-Speaking Patients With Appendicitis Randomized to Antibiotics. *JAMA Surg.* Published June 28, 2023. doi:10.1001/jamasurg.2023.2277

### Data

**Data available:** Yes

**Data types:** Deidentified participant data

**How to access data:** Future availability in 2023

**When available:** beginning date: 07-01-2023

### Supporting Documents

**Document types:** None

### Additional Information

**Who can access the data:** researchers whose proposed use of the data has been approved

**Types of analyses:** for a specified purpose

**Mechanisms of data availability:** after approval of a proposal
